# Supplementary material for: Pre-formulation of an additive combination of two antimicrobial agents, clofazimine and nisin A, to boost antimicrobial activity
Source: Royal Society of Chemistry journal article supplement (doi:10.1039/d3tb01800h), 2024-01-01
Supplement: d3tb01800h1.pdf [file d3tb01800h1.pdf]

## Supplementary Information

Pre-formulation of an additive combination of two  
antimicrobial agents, clofazimine and nisin A, to  
boost antimicrobial activity.

*Mateo Flores Naranjo<sup>1</sup>, Ajay Kumar<sup>1</sup>, Poonam Ratrey<sup>1</sup>, Sarah P. Hudson<sup>1\*</sup>*

*<sup>1</sup>Department of Chemical Sciences, SSPC, the Science Foundation Ireland Research Centre for  
Pharmaceuticals, Bernal Institute, University of Limerick, Castletroy, Limerick, V94 T9PX,  
Ireland.*

*\*Correspondence: [sarah.hudson@ul.ie](mailto:sarah.hudson@ul.ie)*

## Table of Contents

|                                                                                              |   |
|----------------------------------------------------------------------------------------------|---|
| Conditions screened for preparation of CFZ nanoparticles by liquid antisolvent precipitation | 2 |
| Particle size distributions                                                                  | 3 |
| FTIR and SSNMR Analysis                                                                      | 4 |

**Conditions screened for preparation of CFZ nanoparticles by liquid antisolvent precipitation.**

Table S1. List of stabilizers and concentrations screened in the antisolvent phase for the antisolvent precipitation of CFZ particles.

| Anti-solvent                 | Stabilizers                                               | Z-Average Size (nm) | PDI   | Zeta Potential (mV) |
|------------------------------|-----------------------------------------------------------|---------------------|-------|---------------------|
| <b>HCl/KCl pH 2.0 buffer</b> | ---                                                       | 996                 | 0.746 | 24.5 ± 1.21         |
|                              | 0.2% w/v Nisin A                                          | 568                 | 0.637 |                     |
|                              | 0.2% w/v PVP                                              | 729                 | 0.815 |                     |
|                              | 0.2% w/v Nisin A + 0.2% w/v PVP                           | 164                 | 0.361 |                     |
|                              | 0.4% w/v Nisin A + 0.2% w/v PVP                           | 201                 | 0.283 | 17.06 ± 1.29        |
|                              | 0.2% w/v Nisin A + 0.3% w/v PVP                           | 210                 | 0.299 |                     |
|                              | 0.2% w/v Nisin A + 0.2% w/v Pluronic F-127                | 1563                | 0.454 |                     |
|                              | 0.2% w/v Nisin A + 0.2% w/v PVP + 0.2% Pluronic F-127     | 3019                | 0.538 |                     |
|                              | 0.2% w/v Nisin A + 0.2% w/v PVA                           | 500                 | 0.823 |                     |
|                              | 0.1% w/v Nisin A + 0.1% w/v HPMC + 0.05% w/v lecithin     | 394                 | 0.557 |                     |
|                              | 0.2% w/v Nisin A + 0.2% w/v PVP + 0.05% lecithin          | 290                 | 0.873 |                     |
|                              | 0.5% lecithin (+ CFZ in THF) into 0.2% Nisin A + 0.2% PVP | 1385                | 0.568 |                     |
|                              | 0.5% lecithin (+ CFZ in THF) into 0.2% Nisin A + 0.4% PVP | 1108                | 0.468 |                     |
| <b>0.1% TFA (aq.)</b>        | ---                                                       | 228                 | 0.372 | 54.7 ± 2.44         |
|                              | 0.4% w/v Nisin A                                          | 166                 | 0.241 | 26.9 ± 1.04         |
|                              | 0.2% w/v PVP                                              | 210                 | 0.296 |                     |
|                              | 0.2% w/v Nisin A + 0.2% PVP                               | 178                 | 0.198 |                     |
|                              | 0.2% w/v Nisin A + 0.3% PVP                               | 178                 | 0.264 |                     |
|                              | 0.2% w/v Nisin A + 0.4% PVP                               | 187                 | 0.277 |                     |
|                              | 0.3% w/v Nisin A + 0.2% PVP                               | 171                 | 0.226 |                     |
|                              | 0.4% w/v Nisin A + 0.2% PVP                               | 173                 | 0.154 | 28.87 ± 1.14        |

## Particle size distributions

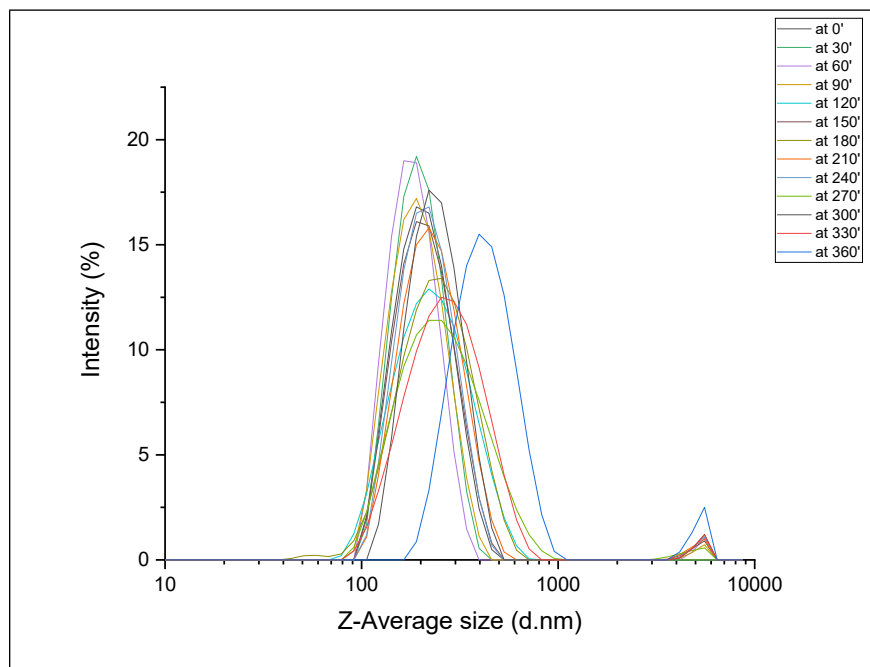

Figure S1. Particle size distribution over time of CFZ- salt nanosuspension in the presence of nisin A. Formulation: 0.3 mL 50 mg/mL CFZ in THF into 20 mL 0.4% v/w nisin A in 0.1% TFA (aq.)

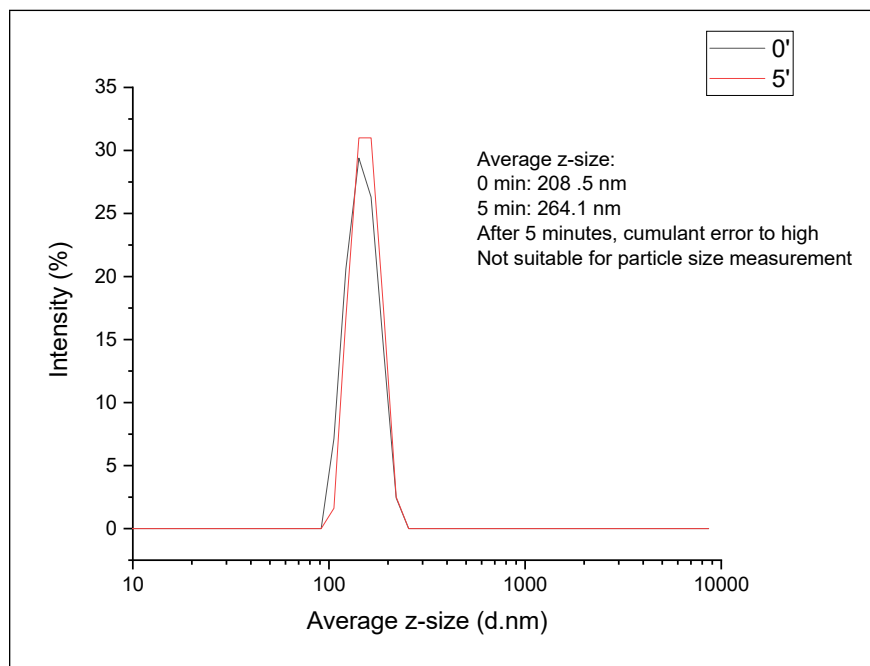

Figure S2. Particle size distribution and average size values of CFZ- salt nanosuspension in the absence of nisin A over time. Formulation: 0.3 mL 50 mg/mL CFZ in THF into 20 mL in 0.1% TFA (aq.)

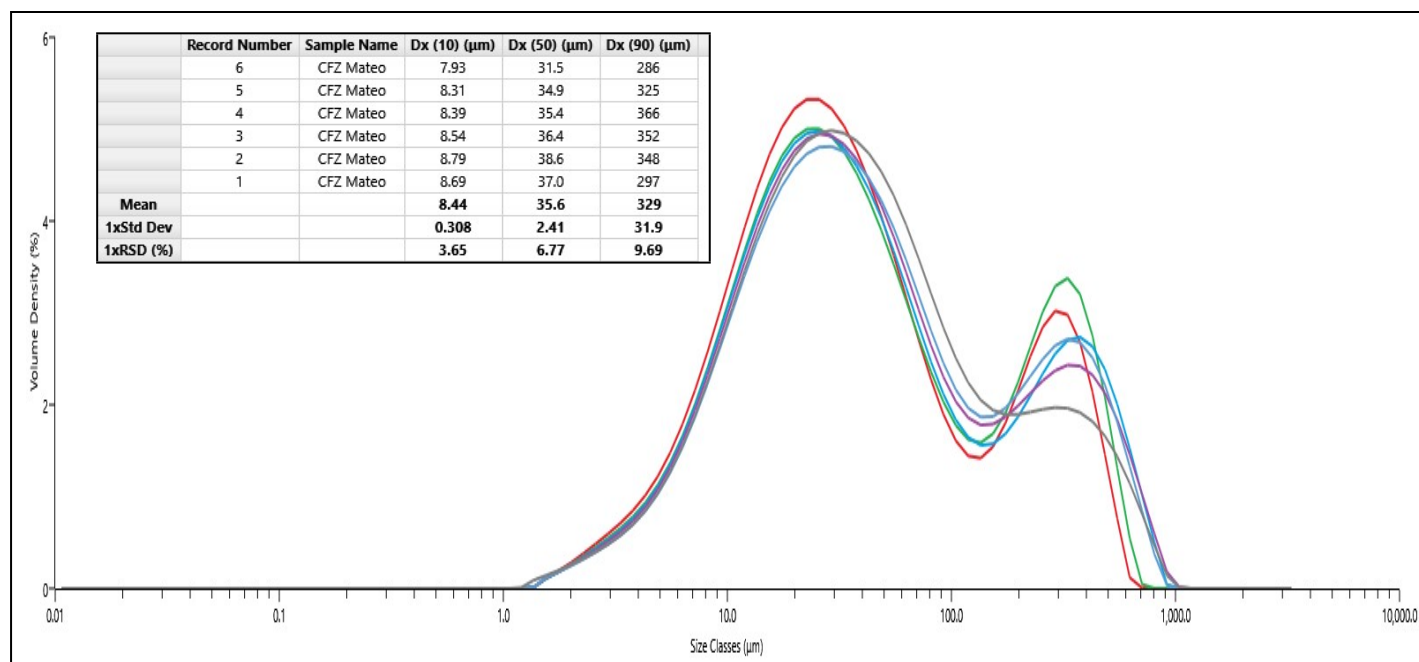

Figure S3. Particle size distribution and average size values of micron-sized CFZ TFA<sup>-</sup> salt particles. Formulation: 1 mL of 250 mg/mL CFZ in THF into 100 mL 1 M TFA (aq.).

## FTIR and SSNMR Analysis

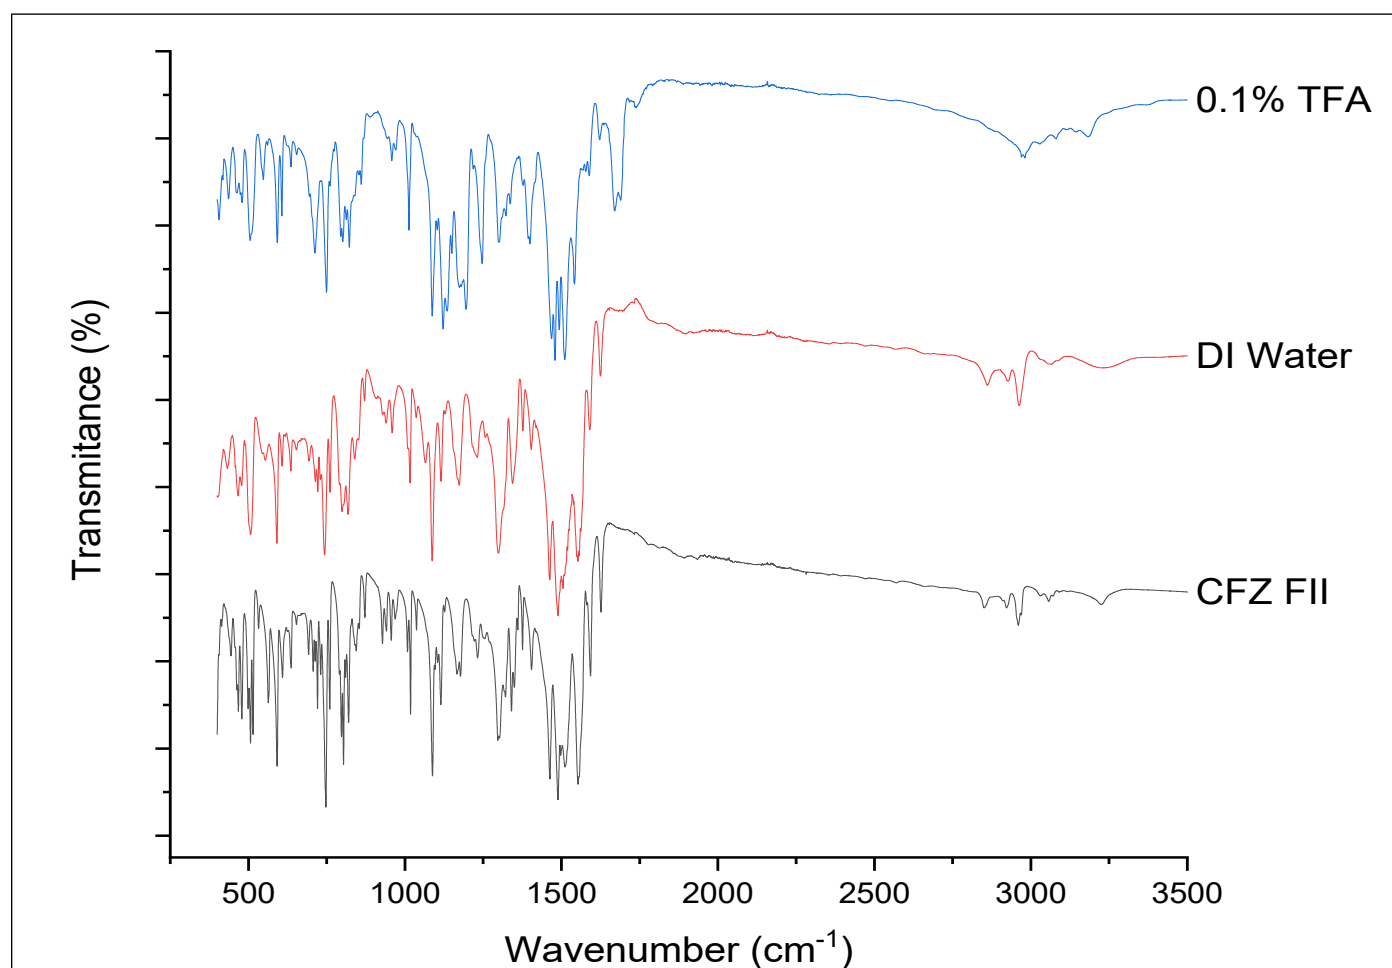

Figure S4. FTIR spectra of CFZ species precipitated in different antisolvents

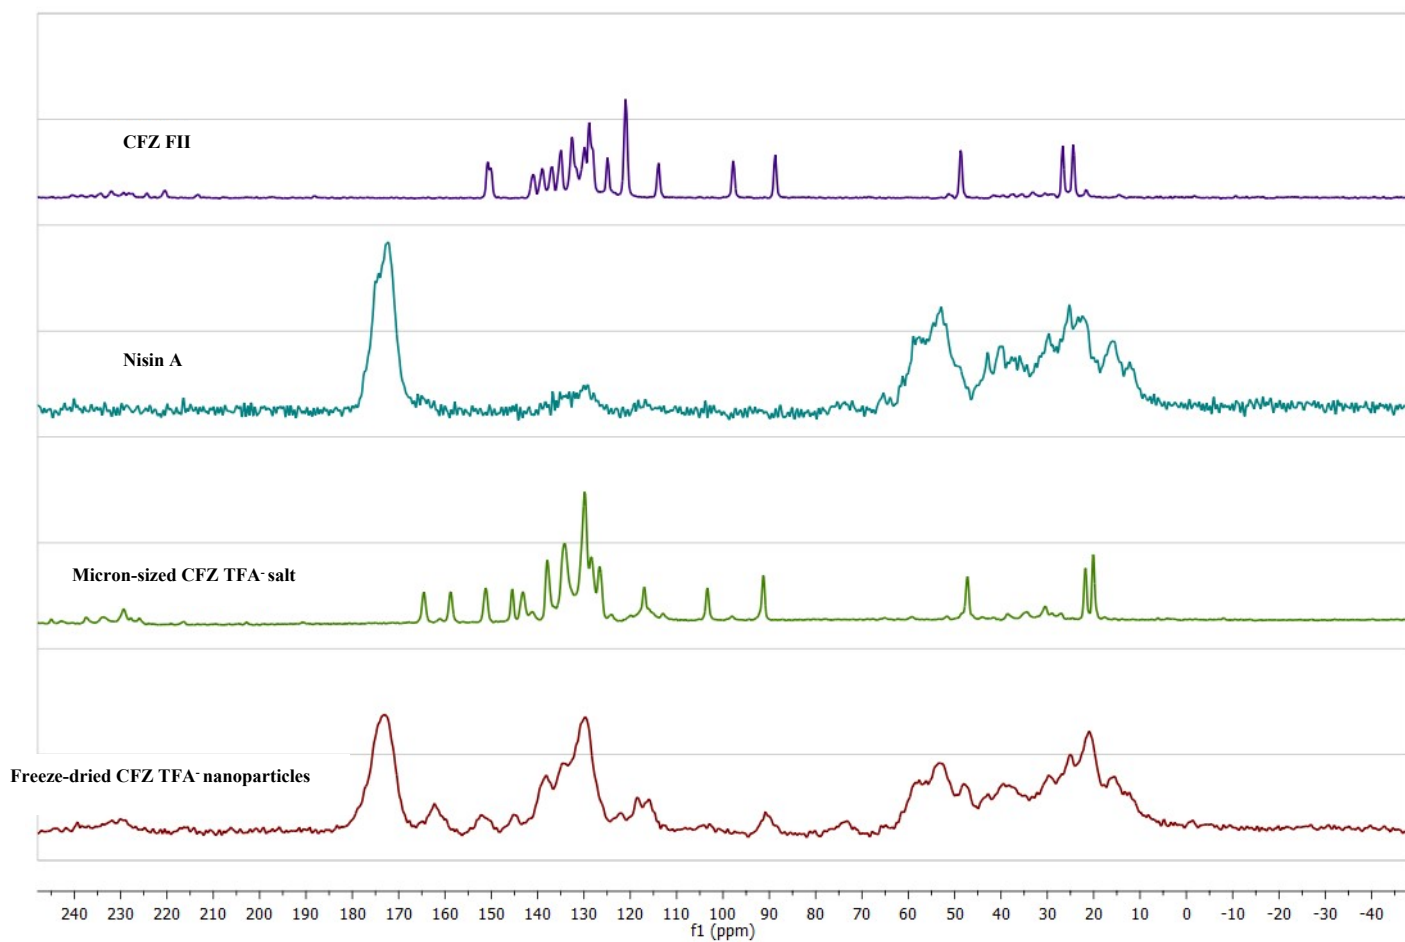

Figure S5.  $^{13}\text{C}$  CPMAS SSNMR of CFZ species and nisin A
